# Supplementary material for: Synthesis of composite microgel capsules by ultrasonic spray combined with in situ crosslinking
Source: Royal Society of Chemistry journal article supplement (doi:10.1039/c1sm05305a), 2011-01-01
Supplement: c1sm05305a.pdf [file c1sm05305a.pdf]

Electronic Supplementary Information

**Synthesis of Composite Microgel Capsules by Ultrasonic Spray Combined with  
in situ Crosslinking**

Lingling Zhao<sup>1</sup>, Lijun Zhu<sup>1</sup>, Qian Wang<sup>1</sup>, Jiaoli Li<sup>1</sup>, Chengliang Zhang<sup>1</sup>, Jiguang Liu<sup>1</sup>,  
Xiaozhong Qu<sup>1\*</sup>, Guanglong He<sup>2</sup>, Yunfeng Lu<sup>3</sup> and Zhenzhong Yang<sup>1\*</sup>

<sup>1</sup>State Key Laboratory of Polymer Physics and Chemistry, Institute of Chemistry,  
Chinese Academy of Sciences, Beijing 100190, China. <sup>2</sup>Davis Heart & Lung  
Research Institute, The Ohio State University, Columbus, OH 43210, USA.

<sup>3</sup>Department of Chemical and Biomolecular Engineering, University of California at  
Los Angeles, Los Angeles, CA 90095, USA.

\*Corresponding authors. Email: yangzz@iccas.ac.cn, quxz@iccas.ac.cn

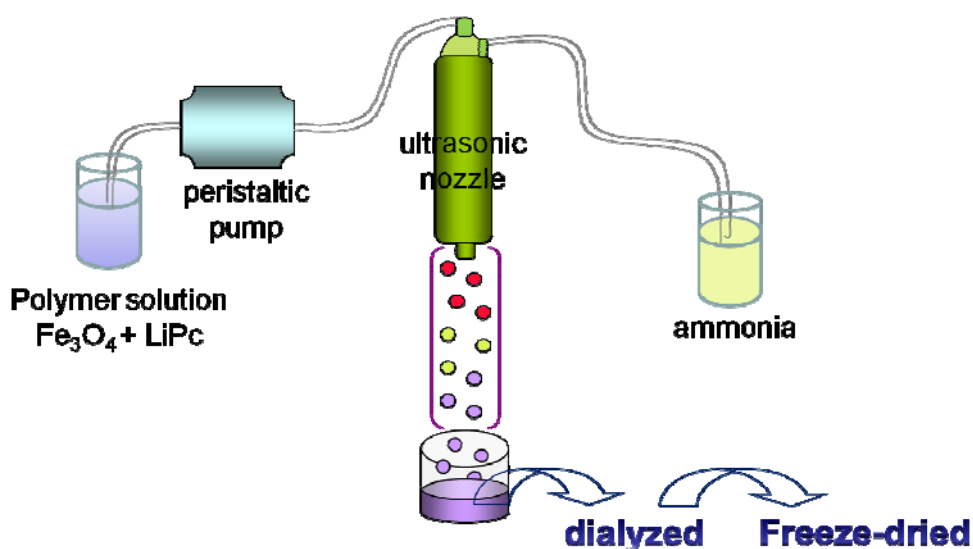

Scheme S1 Illustration of the process for synthesizing Fe<sub>3</sub>O<sub>4</sub> nanoparticle and LiPc microcrystal loaded microgel capsules.

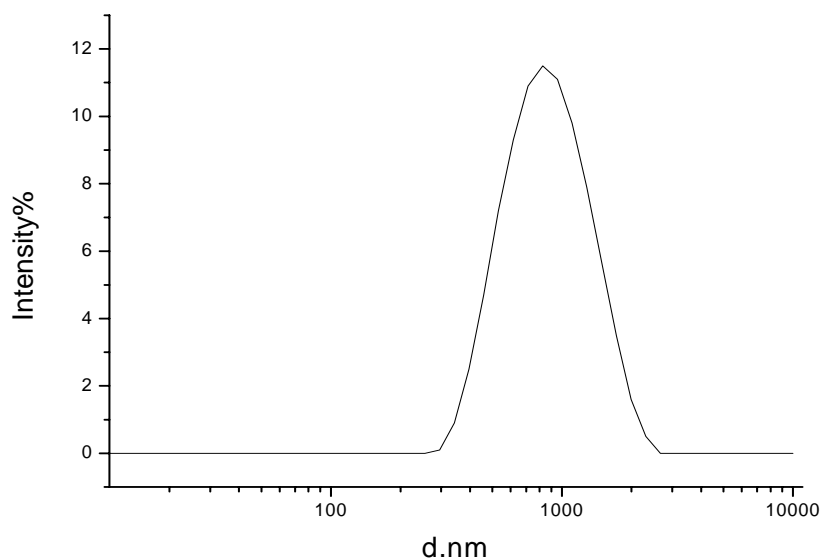

Figure S1 DLS diagram of GC/OHC-PEG-CHO gel capsules prepared from 0.5 wt% polymer solution with an OHC-PEG-CHO feed ratio of 0.2 mol/mol. The concentration used for the DLS measurement was 2 mg/mL.

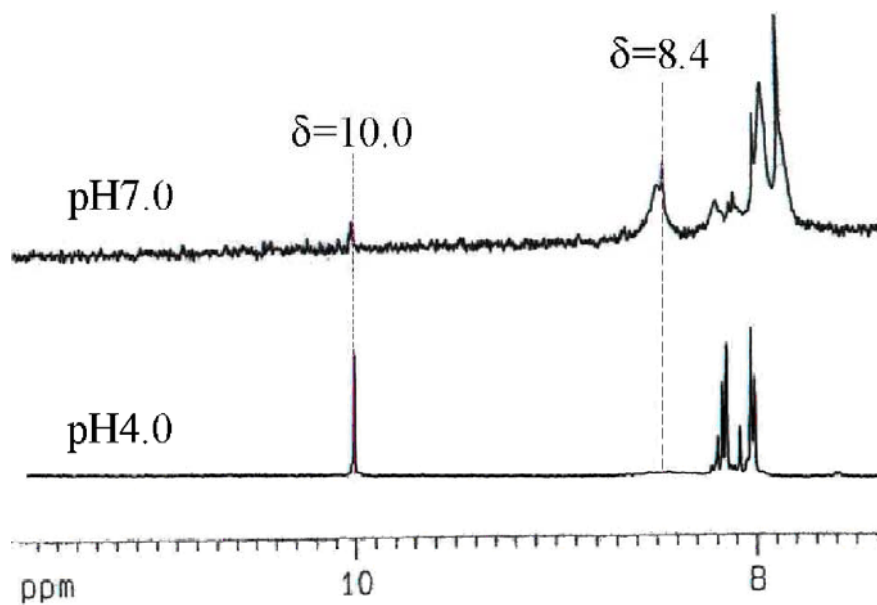

Figure S2 Enlarged <sup>1</sup>H NMR spectra of GC/OHC-PEG-CHO gel capsules in aqueous solution (D<sub>2</sub>O) at pH 7.0 and 4.0. δ 10.0 ppm: aldehyde proton, δ 8.4 ppm: imine proton, δ 8.3-7.9 ppm: aromatic protons.

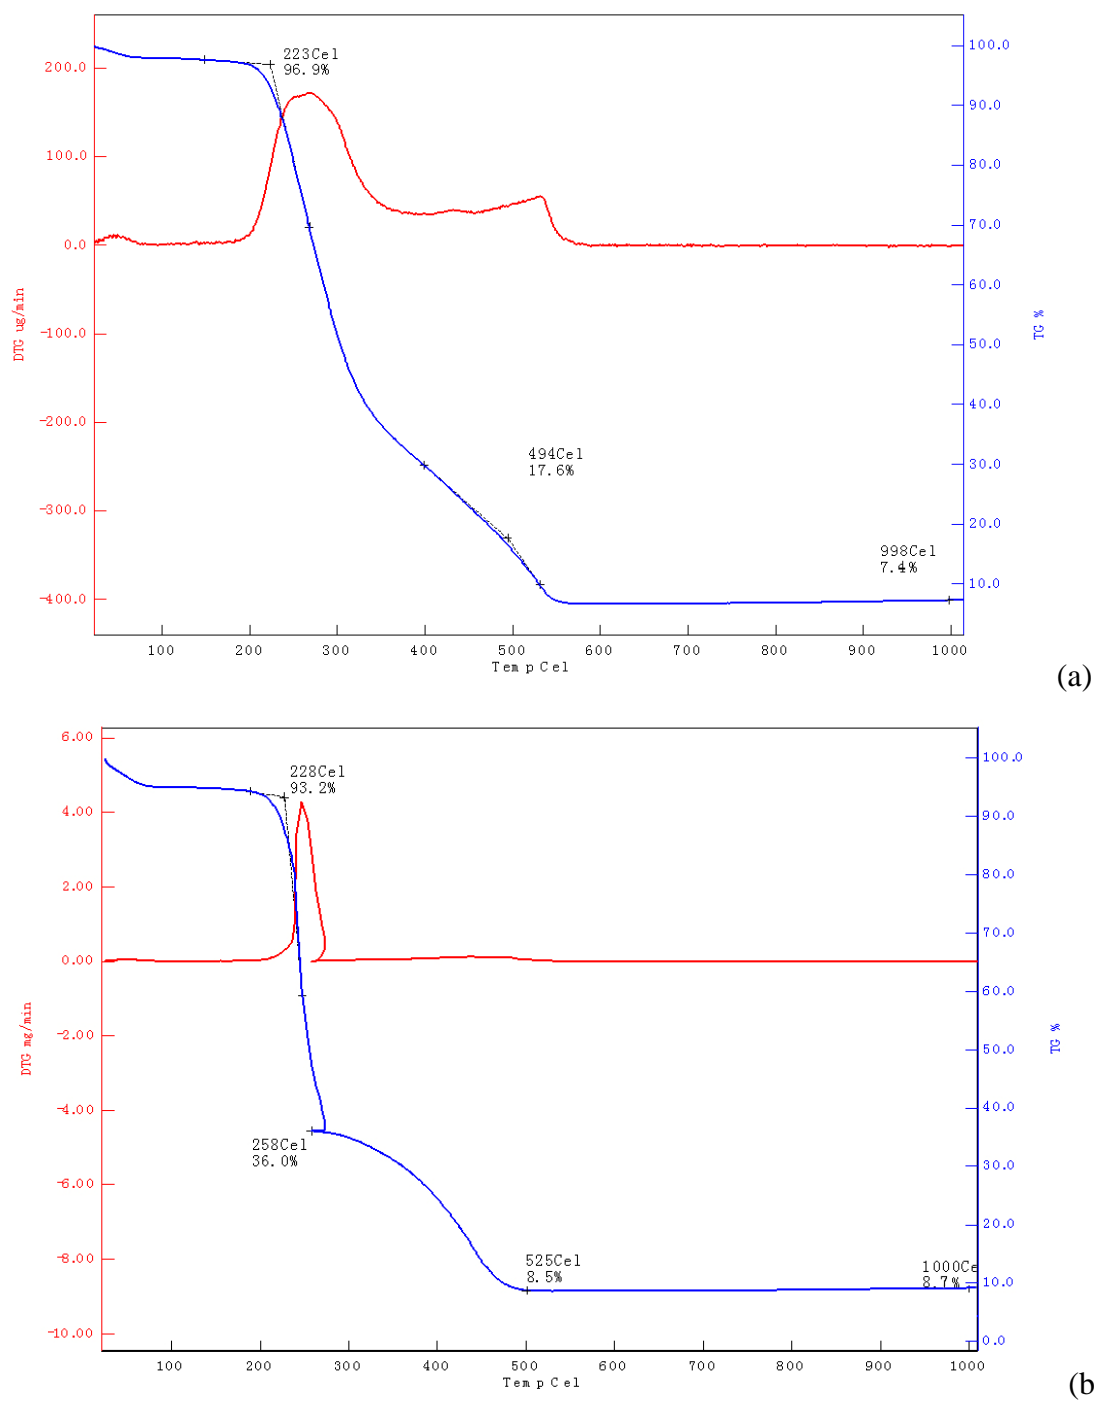

Figure S3 TGA diagrams of Fe<sub>3</sub>O<sub>4</sub>/LiPc (a) and Fe<sub>3</sub>O<sub>4</sub> (b) encapsulated hollow microgels, measured at heating rate of 10 °C/min under air atmosphere. The content of Fe<sub>3</sub>O<sub>4</sub> was calculated according to the formula  $\text{Fe}_3\text{O}_4 \% = \text{Fe}_2\text{O}_3 \% \times 0.97$ . The polymer concentration used for preparing the capsules was 0.25 wt% and the OHC-PEG-CHO feed content was 60 mol%.
